# Supplementary material for: Multidrug-Resistant Bacteria in Surgical Intensive Care Units: Antibiotic Susceptibility and β-Lactamase Characterization
Source: MDPI journal article supplement (doi:10.3390/pathogens13050411), 2024-05-15
Supplement: s1 [file s1]

| Result overview table--continued from previous page |                          |                                   |             |                                   |             |
|-----------------------------------------------------|--------------------------|-----------------------------------|-------------|-----------------------------------|-------------|
| Sample Name                                         | Sample ID                | Organism (best match)             | Score Value | Organism (second-best match)      | Score Value |
| <u>D4</u><br>(+++)(A)                               | 670<br>(standard)        | Staphylococcus epidermidis        | <u>2.22</u> | Staphylococcus epidermidis        | <u>2.22</u> |
| <u>D5</u><br>(+++)(A)                               | 36<br>(standard)         | <u>Escherichia coli</u>           | <u>2.43</u> | <u>Escherichia coli</u>           | <u>2.24</u> |
| <u>D6</u><br>(+++)(A)                               | 36 OKO MEM<br>(standard) | Enterococcus faecium              | <u>2.49</u> | Enterococcus faecium              | <u>2.40</u> |
| <u>D7</u><br>(+++)(A)                               | 37<br>(standard)         | <u>Escherichia coli</u>           | <u>2.45</u> | <u>Escherichia coli</u>           | <u>2.24</u> |
| <u>D8</u><br>(+++)(A)                               | 37 OKO MEM<br>(standard) | Enterococcus faecium              | <u>2.40</u> | Enterococcus faecium              | <u>2.32</u> |
| <u>D9</u><br>(+++)(A)                               | 128 1<br>(standard)      | <u>Acinetobacter baumannii</u>    | <u>2.32</u> | <u>Acinetobacter baumannii</u>    | <u>2.32</u> |
| <u>D10</u><br>(+++)(A)                              | 2<br>(standard)          | Staphylococcus epidermidis        | <u>2.20</u> | Staphylococcus epidermidis        | <u>2.12</u> |
| <u>D11</u><br>(+++)(A)                              | MC<br>(standard)         | <u>Acinetobacter baumannii</u>    | <u>2.34</u> | <u>Acinetobacter baumannii</u>    | <u>2.29</u> |
| <u>D12</u><br>(+++)(A)                              | 145 MC OKR<br>(standard) | Providencia stuartii              | <u>2.24</u> | Providencia stuartii              | <u>2.22</u> |
| <u>E1</u><br>(+++)(A)                               | MC RAZL<br>(standard)    | Providencia stuartii              | <u>2.54</u> | Providencia stuartii              | <u>2.50</u> |
| <u>E2</u><br>(+++)(A)                               | CNA BIJ<br>(standard)    | Providencia stuartii              | <u>2.41</u> | Providencia stuartii              | <u>2.37</u> |
| <u>E3</u><br>(+++)(A)                               | CNA SIV<br>(standard)    | Providencia stuartii              | <u>2.50</u> | Providencia stuartii              | <u>2.46</u> |
| <u>E4</u><br>(+++)(A)                               | 147 MC<br>(standard)     | <u>Acinetobacter baumannii</u>    | <u>2.36</u> | <u>Acinetobacter baumannii</u>    | <u>2.17</u> |
| <u>E5</u><br>(+++)(A)                               | CNA KR<br>(standard)     | Staphylococcus aureus             | <u>2.56</u> | Staphylococcus aureus             | <u>2.50</u> |
| <u>E6</u><br>(+++)(A)                               | CNA SIT<br>(standard)    | Corynebacterium striatum          | <u>2.40</u> | Corynebacterium striatum          | <u>2.36</u> |
| <u>E7</u><br>(+++)(A)                               | 672<br>(standard)        | <u>Raoultella ornithinolytica</u> | <u>2.22</u> | <u>Raoultella ornithinolytica</u> | <u>2.01</u> |
| Result overview table--continued on next page       |                          |                                   |             |                                   |             |



Result overview table--continued from previous page

| Sample Name            | Sample ID              | Organism (best match)        | Score Value | Organism (second-best match) | Score Value |
|------------------------|------------------------|------------------------------|-------------|------------------------------|-------------|
| <u>F12</u><br>(+++)(C) | 3-1<br>(standard)      | <u>Klebsiella oxytoca</u>    | <u>2.21</u> | <u>Klebsiella oxytoca</u>    | <u>2.12</u> |
| <u>G1</u><br>(+++)(A)  | 4917-1-1<br>(standard) | Micrococcus luteus           | <u>2.03</u> | Micrococcus luteus           | <u>1.94</u> |
| <u>G2</u><br>(-)(C)    | X-1<br>(standard)      | no peaks found               | <u>0.00</u> | no peaks found               | <u>0.00</u> |
| <u>G3</u><br>(+++)(A)  | 4664-1-1<br>(standard) | Staphylococcus haemolyticus  | <u>2.18</u> | Staphylococcus borealis      | <u>1.97</u> |
| <u>G4</u><br>(+++)(C)  | 2-1<br>(standard)      | Staphylococcus epidermidis   | <u>2.35</u> | Staphylococcus epidermidis   | <u>2.24</u> |
| <u>G5</u><br>(+++)(C)  | 3-1<br>(standard)      | Staphylococcus epidermidis   | <u>2.22</u> | Staphylococcus epidermidis   | <u>2.00</u> |
| <u>G6</u><br>(+++)(A)  | KP 51-1<br>(standard)  | <u>Klebsiella pneumoniae</u> | <u>2.24</u> | <u>Klebsiella pneumoniae</u> | <u>2.23</u> |
| <u>G7</u><br>(+++)(A)  | KP 52-1<br>(standard)  | <u>Klebsiella pneumoniae</u> | <u>2.12</u> | <u>Klebsiella pneumoniae</u> | <u>2.02</u> |
| <u>G8</u><br>(+++)(A)  | 4763-1-1<br>(standard) | <u>Citrobacter freundii</u>  | <u>2.30</u> | <u>Citrobacter freundii</u>  | <u>2.27</u> |
| <u>G9</u><br>(+++)(C)  | 2-1<br>(standard)      | <u>Klebsiella pneumoniae</u> | <u>2.38</u> | <u>Klebsiella pneumoniae</u> | <u>2.37</u> |
| <u>G10</u><br>(+++)(C) | 3-1<br>(standard)      | Enterococcus faecalis        | <u>2.39</u> | Enterococcus faecalis        | <u>2.35</u> |
| <u>G11</u><br>(+++)(C) | 4-1<br>(standard)      | Enterococcus faecium         | <u>2.52</u> | Enterococcus faecium         | <u>2.48</u> |
